# Supplementary material for: A sex-ratio Meiotic Drive System in Drosophila simulans. I: An Autosomal Suppressor
Source: PLOS journal article supplement (doi:10.1371/journal.pbio.0050292), 2007-10-30
Supplement: S1 (10.1371/journal.pbio.0050292.s001) [file journal.pbio.0050292.s001]

**Table S1.** Sex Ratio Tested for Various Genotypes

| Crosses | n | Proportion of female (*k*  SEM) |
| --- | --- | --- |
| 1. *SSR12*  *w; e* | 19 | 0.838  0.009 a |
| 2. *SSR54*  *w; e* | 19 | 0.891  0.032 a |
| 3. *SSR151*  *w; e* | 19 | 0.754  0.018 a |
|  |  |  |
| 4. *NSR88*  *w; e* | 10 | 0.516  0.015 |
| 5. *NSR113*  *w; e* | 10 | 0.491  0.010 |
| 6. *NSR118*  *w; e* | 9 | 0.473  0.014 |
|  |  |  |
| 7. *SSR12-2-7*  *w; e* | 43 | 0.895  0.011 a |
| 8. *w; e*  *SSR12-2-7* (3 m  10 f) | 10 | 0.519  0.010 |
| 9. (*SSR12-2-7*  *w; e*)  *w; e* | 10 | 0.518  0.017 |
| 10. (*w; e*  *SSR12-2-7*)  *w; e* | 8 | 0.494  0.020 |
|  |  |  |
| 11. *SSR54-2-3*  *w; e* | 36 | 0.882  0.015 a |
| 12. *w; e*  *SSR54-2-3* (3 m  10 f) | 10 | 0.497  0.019 |
|  |  |  |
| 13. *SSR151-2-10*  *w; e* | 37 | 0.945  0.006 a |
| 14. *w; e*  *SSR151-2-10* (3 m  10 f) | 10 | 0.537  0.013 |
|  |  |  |
| 15. simB  *w; e* | 30 | 0.493  0.012 |
| 16. *w; e*  simB (3 m  10 f) | 10 | 0.499  0.019 |
|  |  |  |
| 17. *SSR12-2-7*  *SSR54-2-3* (*en masse*) | 10 | 0.930  0.013 |
| 18. (*SSR12-2-7*  *SSR54-2-3*)  *w; e* | 29 | 0.950  0.006 |
| 19. *w; e*  (*SSR12-2-7*  *SSR54-2-3*) (3 m  10 f) | 8 | 0.510  0.017 |
|  |  |  |
| 20. *SSR54-2-3*  *SSR12-2-7* (*en masse*) | 10 | 0.897  0.013 |
| 21. (*SSR54-2-3*  *SSR12-2-7*)  *w; e* | 27 | 0.939  0.006 |
| 22. *w; e*  (*SSR54-2-3*  *SSR12-2-7*) (3 m  10 f) | 10 | 0.527  0.012 |
|  |  |  |
| 23. *SSR12-2-7*  *SSR151-2-10* (*en masse*) | 10 | 0.904  0.021 |
| 24. (*SSR12-2-7*  *SSR151-2-10*)  *w; e* | 29 | 0.967  0.006 |
| 25. *w; e*  (*SSR12-2-7*  *SSR151-2-10*) (3 m  10 f) | 10 | 0.510  0.012 |
|  |  |  |
| 26. (*SSR151-2-10*  *SSR12-2-7*)  *w; e* | 24 | 0.928  0.007 |
| 27. *w; e*  (*SSR151-2-10*  *SSR12-2-7*) (3 m  10 f) | 16 | 0.526  0.007 |
|  |  |  |
| 28. *SSR54-2-3*  *SSR151-2-10* (*en masse*) | 10 | 0.942  0.014 |
| 29. (*SSR54-2-3*  *SSR151-2-10*)  *w; e* | 29 | 0.947  0.007 |
| 30. *w; e*  (*SSR54-2-3*  *SSR151-2-10*) (3 m  10 f) | 10 | 0.518  0.012 |
|  |  |  |
| 31. (*SSR151-2-10*  *SSR54-2-3*)  *w; e* | 29 | 0.909  0.010 |
| 32. *w; e*  (*SSR151-2-10*  *SSR54-2-3*) (3 m  10 f) | 10 | 0.536  0.012 |
|  |  |  |
| 33. (*SSR12-2-7*  simB)  *w; e* | 30 | 0.490  0.008 |
| 34. *w; e*  (*SSR12-2-7*  simB) (3 m  10 f) | 10 | 0.502  0.006 |
|  |  |  |
| 35. (simB  *SSR12-2-7*)  *w; e* | 29 | 0.504  0.010 |
| 36. *w; e*  (simB  *SSR12-2-7*) (3 m  10 f) | 10 | 0.502  0.010 |
|  |  |  |
| 37. (*P*40 1-47 *Tmy*  *SSR12-2-7*)  *w; e* | 9 | 0.484  0.014 b |
| 38. *w; e*  (*P*40 1-47 *Tmy*  *SSR12-2-7*) (3 m  10 f) | 9 | 0.526  0.008 b |
|  |  |  |
| 39. (*P*40 7-47 *tmy*  *SSR12-2-7*)  *w; e* | 8 | 0.504  0.017 b |
| 40. *w; e*  (*P*40 7-47 *tmy*  *SSR12-2-7*) (3 m  10 f) | 10 | 0.502  0.011 b |
|  |  |  |

The cross is listed as male  female. All crosses were set up as 1 male  3 *w; e* virgins if not otherwise indicated.

a The sex ratios of two extracted lines (*SSR12-2-7* and *SSR151-2-10*) are significantly higher than that of the original *SSR* lines IG12 and IG151, respectively (*t*-test, *P* <0.001). However, this is not the case for *SSR54-2-3* as compared to IG54 (*P* = 0.794).

b P40 7-47 *tmy* and P40 1-47 *Tmy* are heterozygous introgression lines where a *D. mauritiana* chromosomal fragment, covering the *too much yang* allele (*tmy*) or not (*Tmy*), respectively. The male genotype tested in cross 37 is *w*; *nt*; *P*40 1-47 *Tmy*/*SSR12-2-7* while that for cross 39 is *w*; *nt*; *P*40 7047 *tmy*/*SSR12-2-7*.
